# Supplementary material
Source: publisher figshare collection journal article supplement (https://acs.figshare.com/ndownloader/files/3734365)
Supplement: Supplementary file 1 [file 3734365]

Supporting information for:

**Biobased Fat Mimicking Molecular Structuring Agents for Medium Chain Triglyceride and other Edible Oils**

---

**Julian R. Silverman<sup>1,2</sup>, George John<sup>1,2\*</sup>**

<sup>1</sup>Department of Chemistry and Center for Discovery and Innovation (CDI), The City College of New York, 85 St. Nicholas Terrace, New York, NY 10031; <sup>2</sup>Ph.D. Program in Chemistry, The Graduate Center of the City University of New York, New York, NY 10016.

\* Author to whom correspondence should be addressed. E-mail: [gjohn@ccny.cuny.edu](mailto:gjohn@ccny.cuny.edu)

Tel: (+1) 212-650-8353 Fax: (+1) 212-650-6107

Homepage: <http://www.sci.ccny.cuny.edu/~john/index.html>

## Table of Contents:

1. Spectroscopic Characterization for RKG8, RKG18 and RKGO
2.  $^1\text{H}$ NMR Spectra for RKG8 in polar/non-polar solvents, **SI Figure 1**
3. Minimum Gelation Concentration and Gelation Information, **SI Table 1**
4. Gelation Temperature and Melting Point Ranges for Gels, **SI Table 2**
5. X-Ray Diffraction Peak Data for Gelator and Gels, **SI Table 3**
6. Rheology of Coconut Oil Gels with methodology, **SI Figure 2**
7. Comparison of Oil Type on Gel Strength and Yield Strain, **SI Figure 3**

## Spectroscopic Characterization for RKG8, RKG18, and RKGO

Data for (**RKG8**): Raspberry Ketone Glucoside Caprylate (((2R,3S,4S,5R,6S)-3,4,5-trihydroxy-6-(4-(3-oxobutyl)phenoxy)tetrahydro-2H-pyran-2-yl) methyl octanoate): FT-IR (neat) 3489 (m,  $\nu$ O-H), 3207 (b,  $\nu$ O-H), 2920 (m,  $\text{sp}^3$   $\nu$ C-H<sub>2</sub>), 2850 (m,  $\text{sp}^3$   $\nu$ C-H<sub>2</sub>), 1736 (s, ester  $\nu$ C=O), 1738 (s, ester  $\nu$ C=O), 1711 (s, ketone  $\nu$ C=O), 1512 (s,  $\text{sp}^2$  Ar  $\delta$ C=C), 1230 (s, ester  $\nu$ C-O), 1009 (s, ether  $\nu$ C-O)  $\text{cm}^{-1}$ .  $^1\text{H}$  NMR ( $\text{CDCl}_3$ , 300 MHz, 25  $^\circ\text{C}$ ):  $\delta$  7.07 (d, 2H) 6.94 (d, 2H), 4.83 (d, 1H), 4.45 (d, 1H) 4.31 (d, 1H), 3.65 (s, 2H), 3.57 (s, 1H), 3.46 (s, 1H) 2.78 (d, 4H), 2.35 (t, 2H), 2.12 (s, 3H) 1.60 (t, 2H), 1.26 (s, 8H), 0.86 (s, 3H).  $^{13}\text{C}$  ( $\text{CDCl}_3$ , 300 MHz, 25  $^\circ\text{C}$ ) 208.23 (ketone C=O), 173.38 (ester C=O), 156.21 (aryl), 135.20 (aryl), 130.68 (aryl), 128.60 (aryl), 117.83 (2C, aryl) 77.97 (gluc-C), 76.09 (gluc-C), 74.74 (gluc-C), 71.62 (gluc-C), 69.77 (gluc-C), 66.07 (gluc-CH<sub>2</sub>), 45.08 (ketone  $\alpha$ -CH<sub>2</sub>), 36.04, 31.84, 29.08 (2C), 27.81, 25.14, 24.37, 22.74, 13.89 (fatty acid CH<sub>3</sub>). MS (ESI)  $m/z$  ( $\text{MH}^+$ ) 453.24, M.P.R. 96 - 97 $^\circ\text{C}$ . Elem. Anal. Pred. C: 63.70, H: 8.02, Calc. C: 63.53, H: 8.02

### PARAGRAPH BELOW - JUSTIFICATION NEEDED

Data for (**RKG18**): Raspberry Ketone Glucoside Stearate (((2R,3S,4S,5R,6S)-3,4,5-trihydroxy-6-(4-(3-oxobutyl)phenoxy)tetrahydro-2H-pyran-2-yl) methyl stearate): FT-IR (neat) 3489 (m,  $\nu$ O-H), 3207 (b,  $\nu$ O-H), 2918 (m,  $\text{sp}^3$   $\nu$ C-H<sub>2</sub>), 2850 (m,  $\text{sp}^3$   $\nu$ C-H<sub>2</sub>), 1736 (s, ester  $\nu$ C=O), 1711 (s, ketone  $\nu$ C=O), 1512 (s,  $\text{sp}^2$  Ar  $\delta$ C=C), 1230 (s, ester  $\nu$ C-O), 1009 (s, ether  $\nu$ C-O)  $\text{cm}^{-1}$ .  $^1\text{H}$ -NMR (300 MHz;  $\text{CDCl}_3$ ):  $\delta$  7.06 (d,  $J$  = 8.4 Hz, 2H), 6.93 (d,  $J$  = 8.4 Hz, 2H), 4.80 (m, 1H), 4.33 (d,  $J$  = 11.6 Hz, 1H), 3.64-3.46 (m, 4H), 3.21 (d,  $J$  = 1.1 Hz, 3H), 2.81-2.70 (t, 4H), 2.31 (t,  $J$  = 7.5 Hz, 2H), 2.11 (s, 3H), 1.67 (t,  $J$  = 6.5 Hz, 2H), 1.27 (s, 28H), 0.86 (d,  $J$  = 6.7 Hz, 3H).  $^{13}\text{C}$  ( $\text{CDCl}_3$ , 300 MHz, 25 $^\circ\text{C}$ ) 209.3 (ketone C=O), 175.8 (ester C=O), 157.1 (aryl), 136.0 (aryl), 131.8 (aryl), 129.6 (aryl), 118.8 (2C, aryl) 78.9 (gluc-C), 76.1 (gluc-C), 74.7 (gluc-C), 71.2 (gluc-C), 70.7 (gluc-C), 66.1 (gluc-CH<sub>2</sub>), 46.8 (ketone  $\alpha$ -CH<sub>2</sub>), 37.4, 31.8, 29.8 (2C), 27.8, 25.4, 24.2, 22.4, 14.9 (fatty acid CH<sub>3</sub>). MS (ESI)  $m/z$  ( $\text{MH}^+$ ) 593.42, M.P.R. 111 – 113  $^\circ\text{C}$ . Yields for reaction with methyl stearate: 62%, with vinyl stearate: 87%

JUSTIFICATION NEEDED

Data for (**RKGO**): Raspberry Ketone Glucoside Oleate (((2R,3S,4S,5R,6S)-3,4,5-trihydroxy-6-(4-(3-oxobutyl)phenoxy)tetrahydro-2H-pyran-2-yl) methyl oleate): FT-IR (neat) 3493 (m,  $\nu$ O-H), 3260 (b,  $\nu$ O-H), 2923 (m,  $\text{sp}^3$   $\nu$ C-H<sub>2</sub>), 2853 (m,  $\text{sp}^3$   $\nu$ C-H<sub>2</sub>), 1740 (s, ester  $\nu$ C=O), 1709 (s, ketone  $\nu$ C=O), 1513 (s,  $\text{sp}^2$  Ar  $\delta$ C=C), 1231 (s, ester  $\nu$ C-O), 1069 (s, ether  $\nu$ C-O)  $\text{cm}^{-1}$ .  $^1\text{H}$ -NMR (300 MHz;  $\text{CDCl}_3$ ):  $\delta$  7.15-7.03 (m, 2H), 7.00-6.90 (m, 2H), 5.41-5.26 (m, 1H), 4.94-4.74 (m, 1H), 4.59-4.46 (m, 1H), 4.38-4.20 (m, 1H), 3.80-3.34 (m, 5H), 3.30-3.05 (m, 2H), 3.04-2.48 (m, 7H), 2.45-2.23 (m, 2H), 2.23-2.03 (m, 3H), 1.73-0.44 (m, 31H).  $^{13}\text{C}$  ( $\text{CDCl}_3$ , 300 MHz, 25°C) 207.9 (ketone C=O), 173.4 (ester C=O), 156.7 (aryl) 135.4 (aryl) 130.8 (aryl) 128.5 (C=C) 117.8 (aryl) 115.9 102.0 100.1 76.9 (gluc-C) 74.5 (gluc-C) 73.7 (gluc-C) 69.9 57.7 46.7 45.2 29.5 (fatty acid CH<sub>2</sub>) 14.0 (fatty acid CH<sub>3</sub>) MS (ESI)  $m/z$  (591.38) M.P.R. 96-98 °C. Yield for reaction with vinyl oleate: 56%

**SI Figure 1.**  $^1\text{H}$  NMR Spectra for RKG8 in polar/non-polar solvents

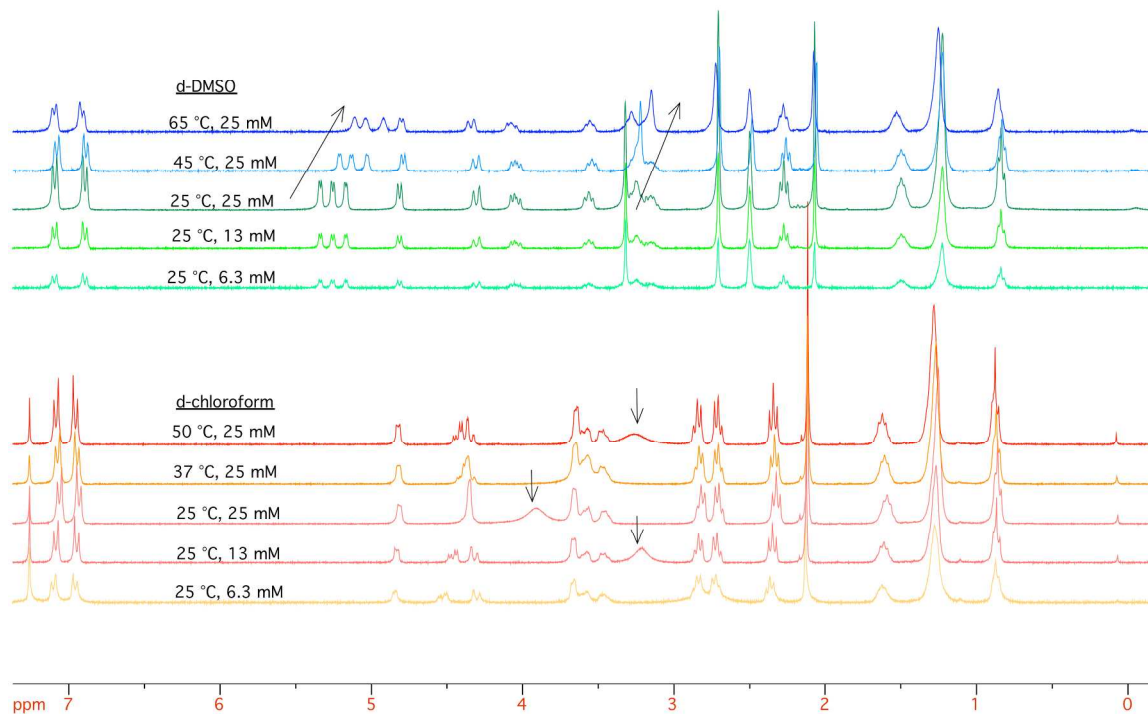

NMR Spectra of R8 Solutions demonstrating inter- and intra-molecular hydrogen bonding. Arrows indicate shifting peaks indicative of changes in hydrogen bonding.

**SI Table 1.** Gelation Index and Minimum Gelation Concentration Values

| Solvent                 | Rasp Ketone Glucoside | RKG8     | RKG18    | RKGO     |
|-------------------------|-----------------------|----------|----------|----------|
| <b>Edible Oils</b>      |                       |          |          |          |
| Hazelnut Oil            | I                     | G (0.26) | G (0.24) | G (0.56) |
| Coconut Oil             | I                     | G (0.27) | G (0.28) | G (0.54) |
| Grape seed Oil          | I                     | G (0.25) | G (0.30) | G (0.66) |
| Red Palm Oil            | I                     | G (0.34) | G (0.36) | G (0.72) |
| Jojoba Oil              | I                     | G (0.25) | G (0.26) | G (0.48) |
| <b>Organic Solvents</b> |                       |          |          |          |
| Hexanes                 | I                     | G (2.1)  | G (0.24) | I        |
| Mineral Oil             | I                     | G (1.4)  | G (0.24) | G (0.80) |
| Toluene                 | PS                    | G (0.5)  | G (0.36) | G (0.73) |
| Water                   | PS                    | I        | I        | I        |

Gelation, solubility and concentration data for RKG8, RKG18, and RKGO gels. Raspberry ketone derivatives formed gels (G, MGC wt. % mg/mL) in edible and inorganic oils, were soluble (S) or partially soluble (PS) in polar aprotic solvents (ethyl acetate, acetone, DMSO, methanol and ethanol), and insoluble (I) in water. The low MGCs in edible oils indicate a consistent gel irrespective of oil composition.

**SI Table 2.** Temperature of Gelation values for gelators and gels

| Sample (Neat)                | Melting Point (°C)    |
|------------------------------|-----------------------|
| RKG                          | 113-115               |
| RKG8                         | 96-97                 |
| RKG18                        | 111-113               |
| RKGO                         | 96-98                 |
| Sample (Gel)                 | T <sub>gel</sub> (°C) |
| 5 wt. % RKG8 in Toluene      | 48-50                 |
| 5 wt. % RKG8 in Olive Oil    | 108-110               |
| 5 wt. % RKG8 in Coconut Oil  | 106-107               |
| 5 wt. % RKG18 in Coconut Oil | 111-112               |
| 5 wt. % RKGO in Coconut Oil  | 105-109               |

Melt temperatures of neat gelators and gels for comparison.

**SI Table 3.** XRD Peak values for Gelator Polymorphs

| <b>XRD</b>     | <b>Small Angle</b>                  |                     | <b>Wide Angle</b>                              |
|----------------|-------------------------------------|---------------------|------------------------------------------------|
| <b>Gelator</b> | <b>Angle (2<math>\theta</math>)</b> | <b>Distance (Å)</b> | <b>Peaks (Å)</b>                               |
| RKG8 Crystal   | 3.30                                | 26.7                | 7.41, 5.90, 5.11, 4.23, 3.71, 3.53, 2.96       |
| RKG8 Bulk      | 2.99                                | 29.6                | 7.10, 5.94, 5.16, 4.39, 3.74, 3.64, 3.54, 2.96 |
| RKG8 Fibres    | 2.99                                | 29.6                | 7.08, 5.93, 4.24, 3.83, 3.73                   |
| RKG18 Fibres   | 2.17                                | 40.8                | 8.38, 7.65, 6.67, 6.52, 3.82, 3.60, 3.47       |

Diffraction peaks for RKG8 polymorphs and RKG18 samples.  $\beta'$  peaks are highlighted.



**SI Figure 2.** Dynamic Oscillatory Rheology of Coconut Oil Gels

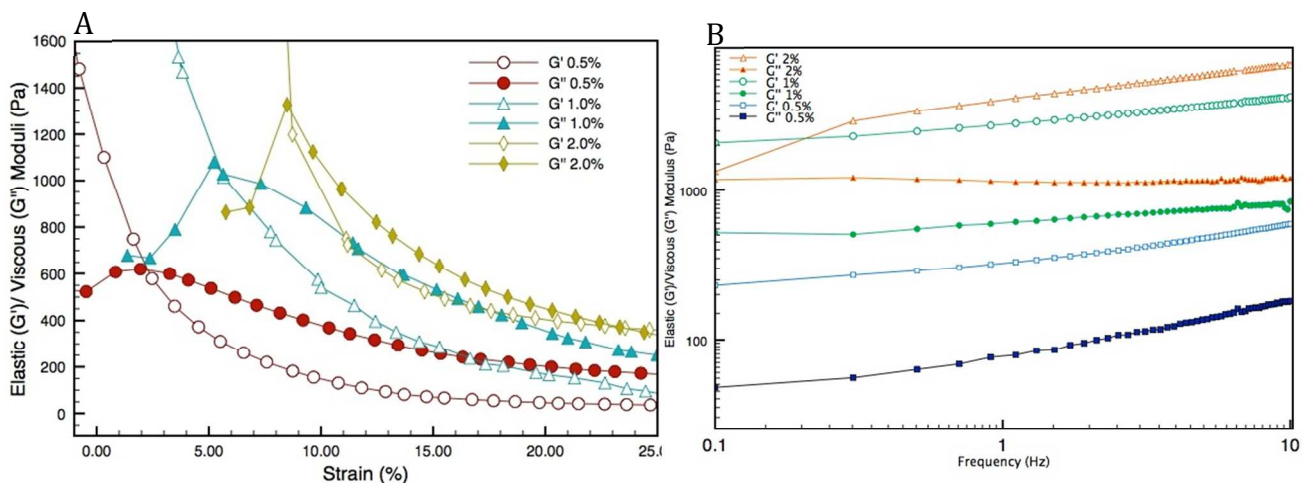

Oscillatory rheometry studies of coconut oleogels. A) Strain sweep curve of various coconut oleogel concentrations to highlight the effect of concentration of gel strength. B) Frequency sweep in the linear viscoelastic region of the same oleogels indicating the gelatinous nature of the binary mixtures

**Rheological Characterization of Gels: Methods.** Oscillatory rheological measurements were performed on a stress-controlled rheometer (AR 2000 ex) with a cone and plate geometry ( $1^\circ 58' 47''$  angle and 40 mm diameter with a truncation gap of  $45 \mu\text{m}$ ). 1 mL of gel was loaded onto the plate, and the cone was lowered to minimize the truncation gap. Precautions were taken to minimize shear-induced disruption of the gel network: before experiments samples were equilibrated within the geometry for 10 minutes. Excess gel was trimmed away from the cone to ensure optimal filling. Yield strain ( $\sigma_y$ ) was examined for coconut oil gels (0.5, 1.0 and 2.0% caprylate gels in coconut oil) by performing oscillatory strain sweep measurements from 0.01 to 100% deformation at a fixed frequency of 1 Hz. Oscillatory frequency sweep measurements were performed in the frequency domain of 0.01 - 10 Hz, with a constant strain of 0.1%, which is within the determined linear viscoelastic regime of the samples. Experiments were run at  $30^\circ\text{C}$ , above the melting point of coconut oil, and repeated twice for each concentration.

**SI Figure 3.** Comparison of Oil Type on Gel Strength and Yield Strain

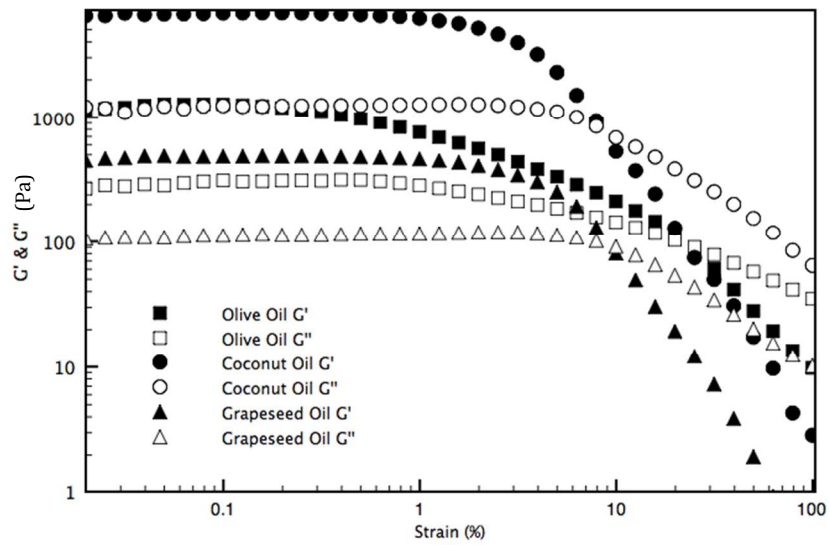

The strength of the gels increases with a decrease in the percent of unsaturations in the triglycerides (saturated fat content: coconut > olive > grapeseed oil).
